# Supplementary material for: Importance of biogenic volatile organic compounds to acyl peroxy nitrates (APN) production in the southeastern US during SOAS 2013
Source: Copernicus journal article supplement (doi:10.5194/acp-19-1867-2019), 2019-02-12
Supplement: Supplementary file 1 [file acp-19-1867-2019-supplement.pdf]

Supplement of Atmos. Chem. Phys., 19, 1867–1880, 2019  
<https://doi.org/10.5194/acp-19-1867-2019-supplement>  
© Author(s) 2019. This work is distributed under  
the Creative Commons Attribution 4.0 License.

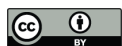

Atmospheric  
Chemistry  
and Physics  
Open Access  
EGU

*Supplement of*

## **Importance of biogenic volatile organic compounds to acyl peroxy nitrates (APN) production in the southeastern US during SOAS 2013**

**Shino Toma et al.**

*Correspondence to:* Steve Bertman ([steven.bertman@wmich.edu](mailto:steven.bertman@wmich.edu))

The copyright of individual parts of the supplement might differ from the CC BY 4.0 License.

## 1 Comparison of APN measurements among WMU, ARA, and UC Berkeley

2 During the SOAS 2013 campaign, two other research groups measured the sum of total APN without  
3 identification of each species. ARA measured total APN using thermal dissociation into NO<sub>2</sub> at 160 °C  
4 on top of ambient NO<sub>2</sub> located within 30 m of the WMU instrument and at the same height. The Berkeley  
5 group measured total APN using thermal dissociation from the tower approximately 100 m north of the  
6 WMU instrument and approximately 25 m above the ground. Total APN from all three groups showed  
7 statistically significant ( $p < 0.01$ ) positive linear correlations with each other based on results from  
8 Spearman's rank correlation test (a nonparametric test was used due to non-normal distributions). The  
9 correlation coefficient,  $r_s$  of each pair (APN<sub>WMU</sub> vs. APN<sub>ARA</sub>, APN<sub>WMU</sub> vs. APN<sub>UC</sub>, and APN<sub>ARA</sub> vs.  
10 APN<sub>UC</sub>) was 0.754, 0.926, and 0.714 respectively. However, a Friedman test resulted in statistically  
11 different medians of APN from three groups. The relationships with APN<sub>WMU</sub> are plotted in Figure S1.  
12 Overall, the measurement of APN<sub>UC</sub> was 50% greater than APN<sub>WMU</sub>, while the measurement of APN<sub>ARA</sub>  
13 was 30% less than APN<sub>WMU</sub>. The strong statistical correlation of all datasets allows the investigation of  
14 APN behavior despite the systematic differences.

15

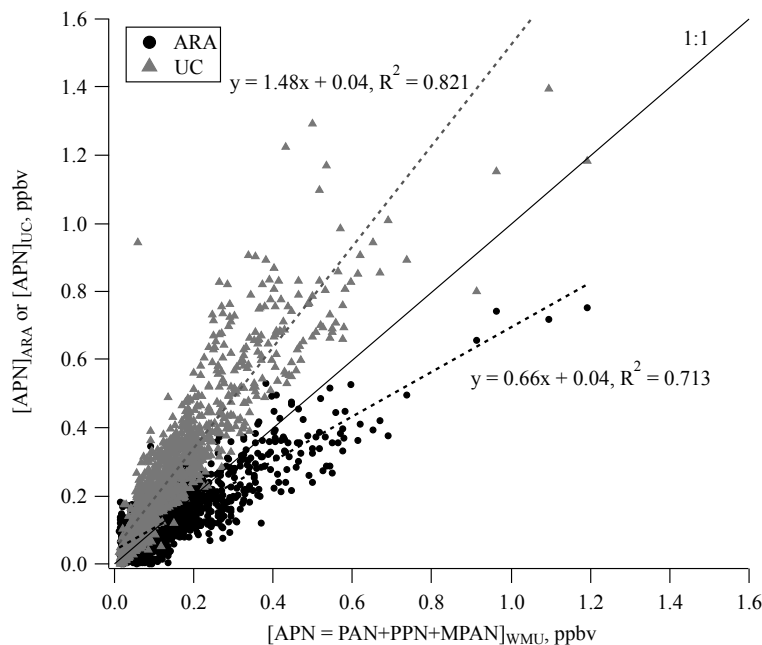

16

17 Figure S1. Relationship of total APN with other research groups during SOAS 2013 campaign.  
18 The means with standard deviation of APN from ARA, UC, and WMU were  $0.129 \pm 0.092$ ,  $0.245 \pm 0.194$ ,  
19 and  $0.138 \pm 0.119$  ppbv respectively. The medians of APN from ARA, UC, and WMU were 0.111, 0.204,  
20 and 0.103 ppbv respectively.

1  
2

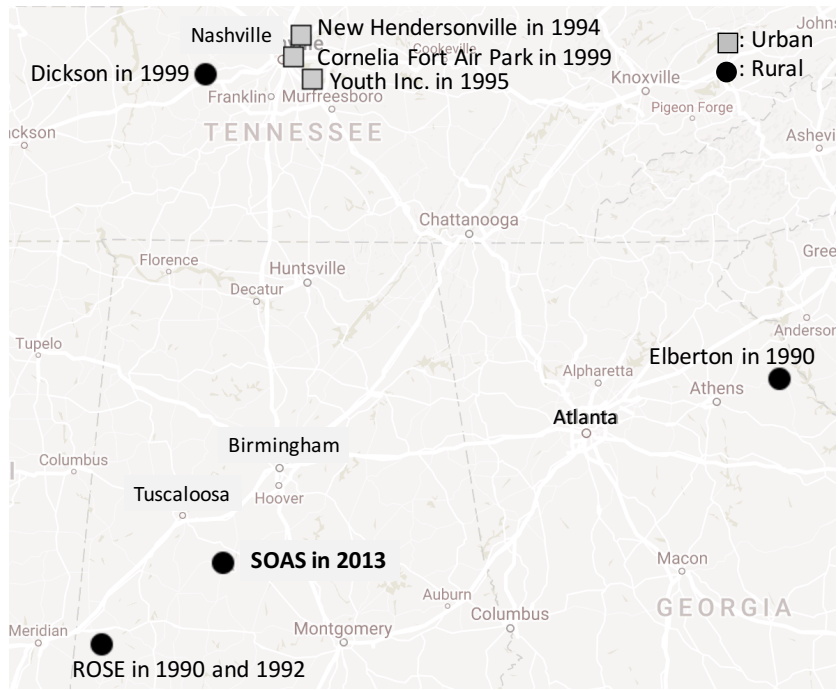

3  
4

5 Figure S2. Various Locations of Other Measurements in the Southeastern U.S. since 1990. Sampling  
6 term: Elberton (June 24<sup>th</sup> – July 13 in 1990), ROSE 1990 (June 10<sup>th</sup> – July 20<sup>th</sup> in 1990), ROSE 1992  
7 (June 19<sup>th</sup> – July 2<sup>nd</sup> in 1992), Henderson (June 22<sup>nd</sup> – July 19<sup>th</sup> in 1994), Youth Inc. (June 29<sup>th</sup> – July  
8 26<sup>th</sup> in 1995), Dickson (June 13<sup>th</sup> – July 15<sup>th</sup> in 1999), Cornelia Fort Ground Site (June 14<sup>th</sup> – July 14<sup>th</sup> in  
9 1999), and SOAS 2013 (June 1<sup>st</sup> – July 15<sup>th</sup> in 2013). (*Data map: Google map, 2016*).

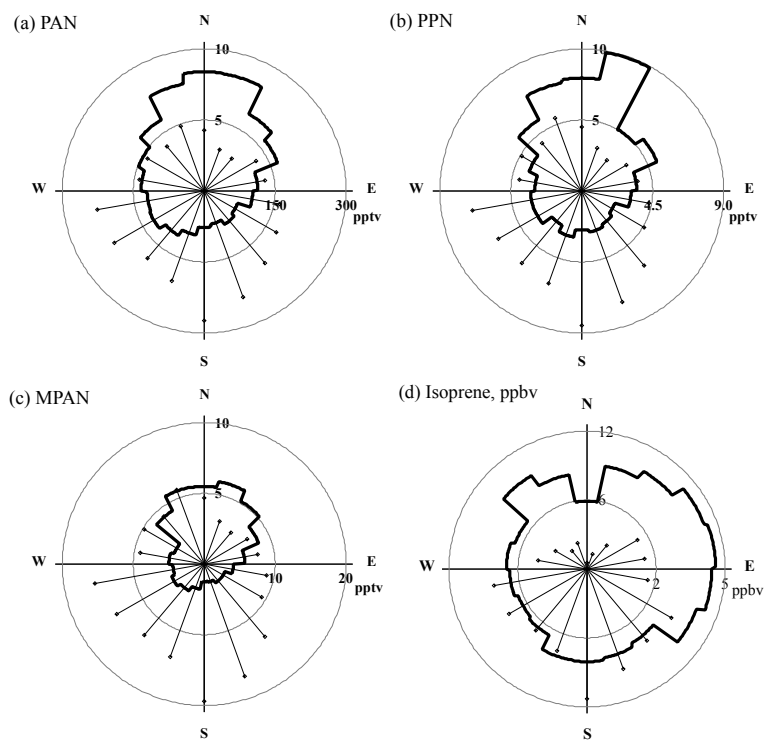

1  
2  
3  
4  
5  
6  
7

Figure S3. Polar plots of APN and isoprene concentrations as a function of wind direction in SOAS 2013 (excluded June 4th). The bold trace line in each plot indicates the average concentration of each compound and the solid lines from the center are the frequency of wind direction.

1

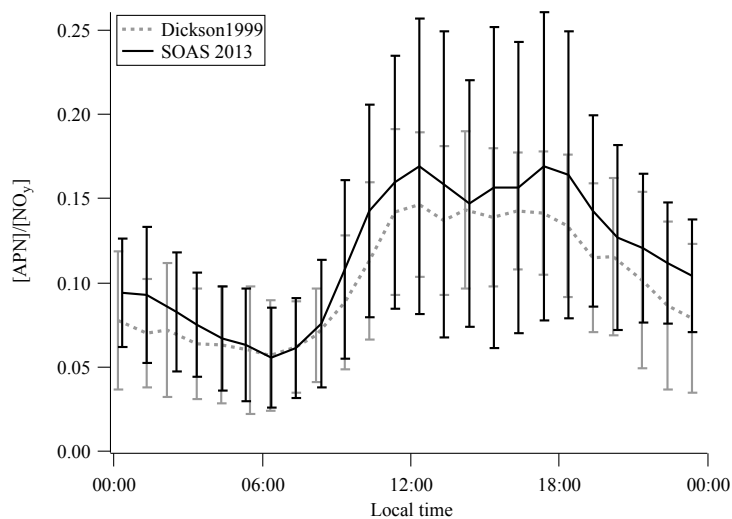

2

(a)

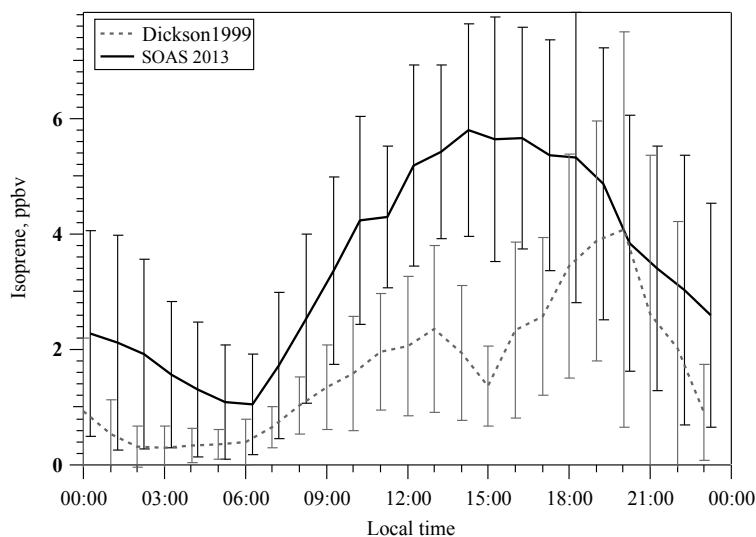

3

4

(b)

5

Figure S4. Hourly diurnal profiles of mean (a) APN/NO<sub>y</sub> and (b) isoprene with one standard deviation from the Dickson 1999 and SOAS 2013 campaigns.

6

7

8

## 9 **Methods and Results of MLR analysis for APN**

10

$$11 \quad [PAN] = A + B_1[MPAN] + B_2[PPN] \quad (1)$$

12

13

In a multiple linear regression (MLR) model as Equation (1), [PAN] is treated as a response variable and [MPAN] and [PPN] are used as independent predictor variables.  $B_1$  and  $B_2$  are partial regression coefficients on [MPAN] and [PPN]. The MLR statistical analysis conducted two steps of statistical testing. First, the  $F$ -test in ANOVA and  $R^2$  investigated how well the model Eq. (1) fits the measurement data. However,  $F$ -test is impossible to directly find out which predictor variable is significantly useful. Therefore, in the next step, the significant utility of each partial regression coefficient

16

17

1 was explored using the Student's  $t$ -test. The respective  $t$ -value was calculated from each partial regression  
2 coefficient divided by the standard error. When results of the  $t$ -test indicate presence of statistical  
3 significance for the partial regression coefficients, the magnitude of the standardized partial regression  
4 coefficient,  $\beta_i$ , allows us to compare the relative contribution of each independent predictor variable within  
5 the model.

6 As the notice to conduct MLR statistical analysis, high multicollinearity causes effects on the  
7 results of the analysis (e.g. Mendenhall et al., 2009). Although the assumption of the MLR statistical  
8 analysis on [PAN] takes a stance that each predictor variable is derived from different hydrocarbon  
9 precursor independently, the values of "tolerance" or "variance inflation factor (VIF)" were helpful to  
10 assess the impact of the multicollinearity. The tolerance is calculated as  $1 - R^2_{\text{MPAN-PPN}}$ , where  $R^2_{\text{MPAN-PPN}}$   
11 is the coefficient of determination between MPAN and PPN and VIF is  $1/\text{tolerance}$ . Large VIF value  
12 indicates strong multicollinearity of predictor variables. According to Stevens (2012), if the value of VIF  
13 is greater than 10, it indicates effective multicollinearity.

14 The statistical analysis was conducted using SPSS statistics software (versions 16, IBM). Results  
15 of  $F$ -test and  $R^2$  on the MLR model for SOAS 2013 during the daytime are summarized in Table S1.  
16 Similar APN data collected from Dickson, TN during the SOS experiment in 1999 is used as a comparable  
17 reference. The small  $p$ -value ( $P$  in Table S1) of  $F$ -test indicated that the overall fit of the model Eq. (1) is  
18 statistically significant in both the SOAS 2013 and Dickson 1999, and at least one independent predictor  
19 variable was significantly useful.

20 Table S1. Summary of the  $F$ -test and  $R^2$ .

| Year                | Number of data | $P$ of $F$ -test | $R$   | $R^2$ |
|---------------------|----------------|------------------|-------|-------|
| Dickson, TN in 1999 | 486            | <0.001           | 0.876 | 0.766 |
| SOAS 2013           | 498            | <0.001           | 0.775 | 0.601 |

21  
22 A summary of coefficients of MPAN and PPN in both SOAS 2013 and Dickson 1999 is shown in  
23 Table S2. Since all VIF values were less than 10, there was no impact of multicollinearity in the MLR  
24 statistical analysis in both SOAS 2013 and Dickson 1999. The small  $p$ -value ( $P$  in Table S2) of the  $t$ -test  
25 of both MPAN and PPN in SOAS 2013 and Dickson 1999 indicates both predictor variables were useful  
26 to predict PAN. Therefore, respective partial regression coefficient values were available to estimate PAN  
27 in SOAS 2013 and Dickson 1999.

28

1

Table S2. Summary of coefficients on each independent predictor variable in  $t$ -test.

|                                | Dickson, TN in 1999 |             | SOAS 2013   |             |
|--------------------------------|---------------------|-------------|-------------|-------------|
|                                | MPAN                | PPN         | MPAN        | PPN         |
| Partial regression coefficient | $B_1$ 5.098         | $B_2$ 5.762 | $B_1$ 7.596 | $B_2$ 6.910 |
| Std. error of coefficient      | 0.305               | 0.178       | 0.469       | 0.725       |
| $P$ of $t$ -test               | <0.001              | <0.001      | <0.001      | <0.001      |
| VIF                            | 1.036               | 1.036       | 1.427       | 1.427       |
| $\beta_i$                      | 0.374               | 0.725       | 0.549       | 0.323       |
| $r_i$                          | 0.509               | 0.795       | 0.726       | 0.624       |
| Partial $R^2 = \beta_i * r_i$  | 0.190               | 0.576       | 0.399       | 0.202       |

Std. error of coefficient means standard error of partial regression coefficient.  $P$  is calculated probability.  $\beta_i$  is standardized partial regression coefficient.  $r_i$  is zero-order correlation. All dataset was during the daytime, 10 am – 4 pm.

2  
3  
4  
5  
6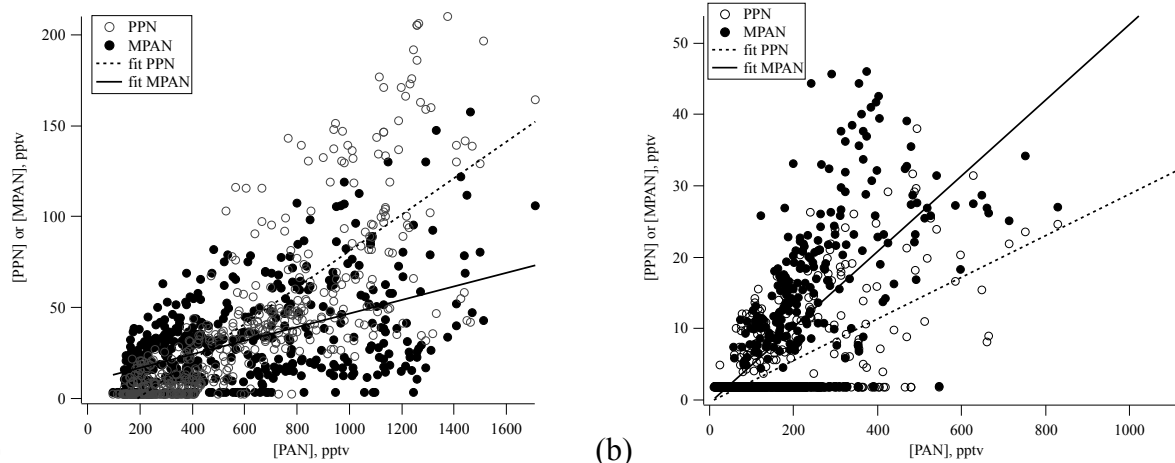7  
8  
9  
10  
11  
12  
13  
14  
15  
16

Figure S5. Scatter plots for PPN vs. PAN and MPAN vs. PAN in (a) Dickson 1999 and (b) SOAS 2013 during the daytime, 10 am – 4pm. The below detection limit data were included at half of the detection limit. The solid line is the fit for MPAN to PAN and the dash line is the fit for PPN to PAN. The slopes with standard deviation were  $0.037 \pm 0.003$  ( $R^2=0.259$ ) for MPAN to PAN and  $0.100 \pm 0.003$  ( $R^2=0.633$ ) in Dickson 1999, and  $0.053 \pm 0.002$  ( $R^2=0.530$ ) for MPAN to PAN and  $0.029 \pm 0.002$  ( $R^2=0.390$ ) in SOAS 2013.

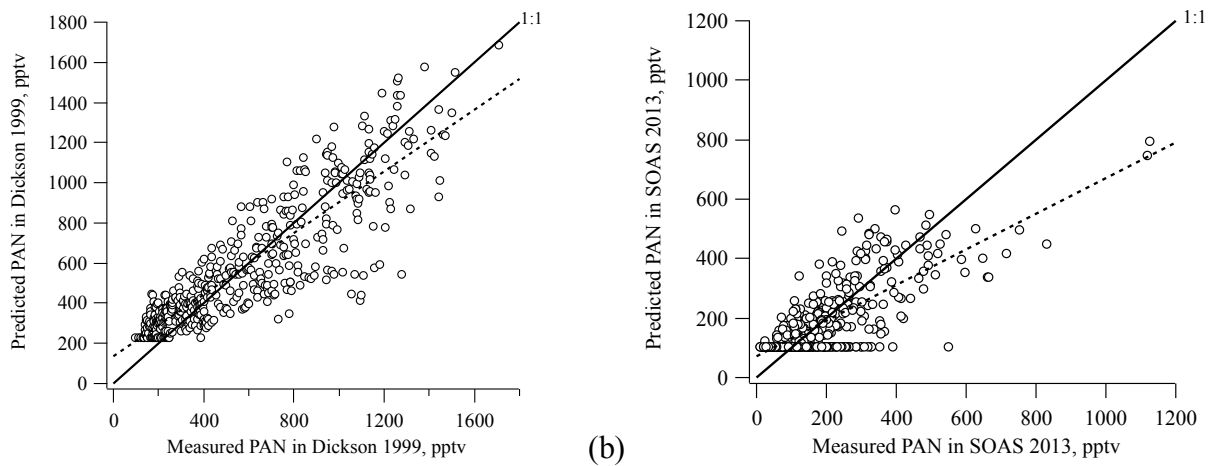

1  
2  
3  
4  
5  
6  
7  
8  
9  
10  
11  
12

Figure S6. Predicted PAN from Equation 1 versus measured PAN (a) in Dickson 1999 and (b) in SOAS 2013 during the daytime, 10 am – 4 pm. The solid line indicates 1:1. The dash lines are the least squares fit; (a)  $\text{predicted PAN} = 0.77 * \text{measured PAN} + 134.73$  ( $R^2=0.767$ ) and (b)  $\text{predicted PAN} = 0.60 * \text{measured PAN} + 71.31$  ( $R^2=0.601$ ). PPN and MPAN data below detection limit in SOAS 2013 were included at half of the detection limit to avoid loss of low concentration information.

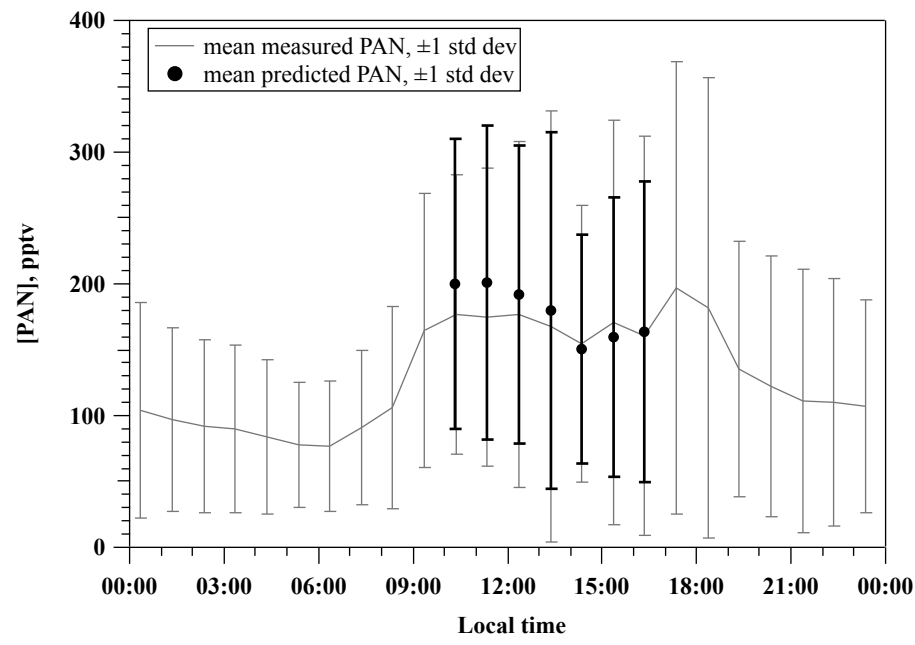

13  
14  
15  
16  
17

Figure S7. Diurnal plot of measured PAN in SOAS 2013 and predicted PAN using MLR statistic. (Note: this measured PAN was not filtered by wind direction like Figure 2.) Predicted PAN was calculated based on measured PPN and MPAN during the daytime (10 am – 4pm).
